# Supplementary material
Source: PubMed Central journal article supplement (PMC3833886)
Supplement: NIHMS513100-supplement-737_2013_373_MOESM2_ESM.pdf [file NIHMS513100-supplement-737_2013_373_MOESM2_ESM.pdf]

| <b>Symbol</b> | <b>Gene name</b>             | <b>Chromosome</b> | <b>Position</b> | <b>Gene length (Kb)</b> |
|---------------|------------------------------|-------------------|-----------------|-------------------------|
| <i>COMT</i>   | Catechol-O-methyltransferase | 22                | 22q11.21        | 28.4                    |
| <i>DRD2</i>   | Dopamine receptor D2         | 11                | 11q23.2         | 65.7                    |
| <i>ESR1</i>   | Estrogen receptor alpha      | 6                 | 6q25.1          | 472.9                   |
| <i>HTR2A</i>  | Serotonin receptor 2A        | 13                | 13q14.2         | 63.6                    |
| <i>MAOA</i>   | Monoamine Oxidase A          | X                 | Xp11.3          | 90.6                    |
| <i>SLC6A3</i> | Dopamine transporter         | 5                 | 5p15.3          | 52.6                    |
| <i>SLC6A4</i> | Serotonin transporter        | 17                | 17q11.2         | 41.6                    |
| <i>TPH2</i>   | Tryptophan hydroxylase 2     | 12                | 12q21.1         | 93.6                    |

Table S1: Genes represented by SNP genotyping in our analysis.
