# Supplementary material
Source: PubMed Central journal article supplement (PMC3833886)
Supplement: NIHMS513100-supplement-737_2013_373_MOESM3_ESM.pdf [file NIHMS513100-supplement-737_2013_373_MOESM3_ESM.pdf]

|                       | Enzyme          | Forward                        | Reverse                           |
|-----------------------|-----------------|--------------------------------|-----------------------------------|
| <i>SERTLPR</i>        | N/A             | [6FAM]ATGCCAGCACCTAACCCCTAATGT | GGACCGCAAGGTGGGCGGGA              |
| <i>DRD2 rs2283625</i> | <i>Hind III</i> | TGCTGAGTGACCTTAGGCAAGCT        | [6FAM]GGACCTGGTTTTTATGGAGCAC      |
| <i>DAT In8 VNTR</i>   | N/A             | GCATGTGGATGTGTTCTTGCA          | [6FAM]TCATCCCAGGGACATCTGCTA       |
| <i>MAOA pVNTR</i>     | N/A             | ACAGCCTGACCGTGGAGAAG           | [6FAM]GAACGGACGCTCCATTCGGA        |
| <i>MAOA rs1137070</i> | <i>EcoRV</i>    | CGGGAAGGTGACCGAGAA             | [6FAM]AGATGTGAGTTTTATGTTCCATGATTG |
| <i>HTR2A rs6311</i>   | <i>Hpa II</i>   | TTCCACTCCGGACACAAACTGT         | [6FAM]CCCATTAAGGTAGGTAAGTGGCACTGT |
| <i>HTR2A rs6314</i>   | <i>BsmI</i>     | [HEX]AGCCAACCTCAAATGGGACAA     | CCTATCACACACAGCTCACCTTTT          |

|                   |                           |
|-------------------|---------------------------|
| DAT rs6347 F      | TTCATCATCTACCCGGAAGCC     |
| DAT rs6347 R      | GAAGAAGACCACGGCCCAG       |
| DAT rs6347 PEF    | ACGCTCCCTCTGTCCTC         |
|                   |                           |
| DAT rs27072 F     | AGAACACAGTGCCCCTGGG       |
| DAT rs27072 R     | TGCAGGGCAGAAAAACGTC       |
| DAT rs27072 PER   | CTGCTCCCTGCTCCC           |
|                   |                           |
| TPH2 rs7305115 F  | ACGAGACTTTCTGGCAGGACTG    |
| TPH2 rs7305115 R  | TTAATTCTCCAATGGAGG-AAAGGA |
| TPH2 rs7305115 PE | GATCCCCTCTACACCCC         |

Table S2: Genotyping primers for non-ESR1 variants except COMT rs4680, which was genotyped with a commercially available TaqMan assay (Life Technologies).
