# Supplementary material
Source: PubMed Central journal article supplement (PMC3833886)
Supplement: NIHMS513100-supplement-737_2013_373_MOESM5_ESM.pdf [file NIHMS513100-supplement-737_2013_373_MOESM5_ESM.pdf]

| Marker                 | Dominant |       |          | Additive |        |          | Recessive |       |          |
|------------------------|----------|-------|----------|----------|--------|----------|-----------|-------|----------|
|                        | P        | Slope | Slope SE | P        | Slope  | Slope SE | P         | Slope | Slope SE |
| <i>COMT rs4680</i>     | 0.26     | -1.41 | 1.24     | 0.03     | -1.57  | 0.73     | 0.03      | -2.59 | 1.15     |
| <i>DRD2 rs2283265</i>  | 0.59     | 0.60  | 1.10     | 0.47     | 0.71   | 0.97     | 0.41      | 2.64  | 3.17     |
| <i>HTR2A rs6311</i>    | 0.38     | -0.95 | 1.08     | 0.62     | -0.35  | 0.70     | 0.91      | 0.14  | 1.22     |
| <i>HTR2A rs6314</i>    | 0.14     | 1.94  | 1.30     | 0.05     | 2.29   | 1.17     | 0.02      | 10.22 | 4.40     |
| <i>MAOA pVNTR</i>      | 0.48     | 0.75  | 1.05     | 0.37     | 0.71   | 0.80     | 0.46      | 1.22  | 1.67     |
| <i>MAOA rs1801291</i>  | 0.13     | 1.54  | 1.00     | 0.05     | 1.46   | 0.74     | 0.08      | 2.76  | 1.57     |
| <i>SLC6A3 In8 VNTR</i> | 0.86     | 0.19  | 1.04     | 0.95     | 0.06   | 0.89     | 0.79      | -0.70 | 2.62     |
| <i>SLC6A3 rs6347</i>   | 0.38     | 0.90  | 1.01     | 0.67     | 0.34   | 0.78     | 0.57      | -1.00 | 1.76     |
| <i>SLC6A3 rs27072</i>  | 0.24     | 1.35  | 1.14     | 0.46     | 0.70   | 0.95     | 0.51      | -1.74 | 2.62     |
| <i>SERTLPR</i>         | 0.97     | -0.04 | 1.06     | 1.00     | -0.003 | 0.73     | 0.97      | 0.05  | 1.35     |
| <i>TPH2 rs7305115</i>  | 0.92     | -0.10 | 1.06     | 0.78     | -0.21  | 0.75     | 0.68      | -0.58 | 1.42     |

Table S4: Genetic association summary of functional polymorphisms in the additional seven candidate genes with EPDS score.
